# Supplementary material for: Superelasticity and cryogenic linear shape memory effects of CaFe2As2
Source: PubMed Central journal article supplement (PMC5715139; doi:10.1038/s41467-017-01275-z), 2017-10-20
Supplement: 41467_2017_1275_MOESM2_ESM.pdf [file 41467_2017_1275_MOESM2_ESM.pdf]

## **Description of Additional Supplementary Files**

File Name: Supplementary Movie 1

Description: Cyclic compression test with 20 cycles.
